# Supplementary material
Source: PubMed Central journal article supplement (PMC4589440)
Supplement: NIHMS690549-supplement-1.pdf [file NIHMS690549-supplement-1.pdf]

Supplemental Information

Heterogeneity of epigenetic changes at ischemia/reperfusion- and endotoxin-induced AKI  
genes.

<sup>1</sup>Daniel Mar, <sup>1,2</sup>Sina A. Gharib, <sup>3</sup>Richard A. Zager, <sup>3</sup>Ali Johnson, <sup>1</sup>Oleg Denisenko, <sup>1</sup>Karol Bomsztyk,

<sup>1</sup>UW Medicine Lake Union, <sup>2</sup>Computational Medicine Core, Center for Lung Biology,  
University of Washington, Seattle, WA 98109, USA. <sup>3</sup>the Fred Hutchinson Cancer  
Research Center Seattle, WA 98109, USA.

Running title: Epigenetic portraits of AKI genes

Address for correspondence:

Karol Bomsztyk

UW Medicine at Lake Union

Box 358050

University of Washington,

Seattle, WA 98109 USA

Tel. (206) 616-7949

Fax. (206) 616-8591

e-mail: [karolb@u.washington.edu](mailto:karolb@u.washington.edu)

Table S1- PCR primers RT-qPCR

| Primer     | Sequence                 | Primer      | Sequence                       |
|------------|--------------------------|-------------|--------------------------------|
| Agt FWD    | GCGCTGACCGAGAATAAATG     | Kim1 FWD    | TTGCCTCCGTGTCTCTAA G           |
| Agt REV    | GTCA CCCCA GTA TCCAAA CA | Kim1 REV    | AGATGTTGTCTTCA GCTCGG          |
| Angpt1 FWD | AGTTGGAA CAGCCCA TTGTA   | Klotho FWD  | TTTGTCA TGGGTGGTAGAGG          |
| Angpt1 REV | TGAAAGCCCTACGAA CACTTT   | Klotho REV  | TCAGATA CCA TTCA CCCTGC        |
| Angpt2 FWD | AAGAA TGTTCCTGGGAGTT     | Kmt1b FWD   | ACTTCTGGGGATTA GATGCG          |
| Angpt2 REV | TGCTTAGAGGAA TGTGGTCC    | Kmt1b REV   | TTAGAACTCCCA GACCCAGA          |
| Bax FWD    | CATGGCAGACA GTGACCATC    | Kmt1c FWD   | CATCAA CA CCTGAGGACTCT         |
| Bax REV    | GAAAAA TGCCCTTCCOCTTC    | Kmt1c REV   | TTACTGGGGTCTCTGATGGA           |
| Bclx FWD   | GCTGGTGCCAGAGACTGAC      | Lamc1 FWD   | GGAACTTCCCA CACGGGTC           |
| Bclx REV   | GCCCCCAGAA GCCA GAA ACC  | Lamc1 REV   | CGGTGCTGATGCCCTCAAGT           |
| Bmp7 FWD   | GTCTCAGGAAGAGCTA GTGG    | Ldlr FWD    | GTCTGTGTGGAGGAACTG             |
| Bmp7 REV   | TCGACGACAGCTCTAA TGTC    | Ldlr REV    | CAGGCTGACCA TCTGTCTTG          |
| Clu FWD    | ACCCCA GAGAACTCCACAT     | L-FABP FWD  | CAAGCTGGAAGGTGACAATAA          |
| Clu REV    | TGCA GGCA TTA GTGTACAGA  | L-FABP REV  | GTGTCTCCA TTGAGTTCA GTC        |
| Cox2 FWD   | TGCCTCCCACTCCA GACTAGA   | Mcp1 FWD    | TTGAA TGGAAGTTGACCCCG          |
| Cox2 REV   | CAGCTCAGTTGAA CGCCTTTT   | Mcp1 REV    | TTAAGGCA TCA CA GTCCGAG        |
| Cst3 FWD   | AAGGGCTGAGTCTAGAA GGA    | Nphs1 FWD   | CCTATGACCTTCGCTGGCCT           |
| Cst3 REV   | CCTTCTCGAGA TGAAACAC     | Nphs1 REV   | AGGCTCCCCAGCA TCCATGT          |
| Ctgf FWD   | TGCTGTGCA GGTGATAAAGC    | Nphs2 FWD   | CAGAGGCTTAGGTGCTCGGATGA        |
| Ctgf REV   | CCACCCCAA CCA GTCA TAA   | Nphs2 REV   | TCATCGA CTCA GTCTTGCCCTCTG     |
| Egr1 FWD   | AACAGCCCTTTCAC TTACCA    | Netrin1 FWD | CCCTTTGCTTACCA TTTGGG          |
| Egr1 REV   | CTTGGACA TGGCTGTTTCAG    | Netrin1 REV | CACATA CCTTTGTGCCACTG          |
| Ezh2 FWD   | TGAAAGTATGTGGGCA TCGAA   | Ngal FWD    | AGATGCTCCTTGTA TGGTG           |
| Ezh2 REV   | GAAAGCTAAGGCA GCTGTTTC   | Ngal REV    | CTGTCTGCCACTCCATCTTT           |
| Flt1 FWD   | GACATGGGAA GACAGGGTAG    | p53 FWD     | CTCTGAGTA GTGGTTCCTGG          |
| Flt1 REV   | AGCCATTTTAGA GACCCAGG    | p53 REV     | TGGCTGGA TAGAA TTTGCT          |
| Fsp1 FWD   | GGAGGCCCTGGATGTA TTGT    | Pai1 FWD    | TGAGAGAGGGCAA AAGTGTT          |
| Fsp1 REV   | TGTCA CCTCTTTGCTGAGT     | Pai1 REV    | ATACAGCA GCGGAAA TGAC          |
| Gapdh FWD  | AAC TTGGCA TTGTGGAAGG    | Pecam1 FWD  | TGCCCTGTTCA TGTGGGTA           |
| Gapdh REV  | AGTGGATGCA GGGATGATGT    | Pecam1 REV  | TCTCTGGAA OCTCTTTCA            |
| Hmgcr FWD  | TGTTCAA GGAGCATGCAA AG   | Rage FWD    | GATGCAA AGGCAA TCTCACTCCTGCATC |
| Hmgcr REV  | CTTACCTGTTGTAACCATGTG    | Rage REV    | CCTGGTATGGTGGGAGGCA TAG        |
| Hmx1 FWD   | TCTTGCCTGGCTCTCTCTC      | Sema3a FWD  | GCGGTGGCTTATGTA CTA CT         |
| Hmx1 REV   | GGCTGCTGGTTTCAAAGTTC     | Sema3a REV  | GGAA CAATTTACGACCTGGC          |
| Hpx FWD    | GGGCCAA ATTTGTA CTGCTA   | Spp1 FWD    | CATGAA GAGCGGTGAGTCTA          |
| Hpx REV    | CCAA GGATGCTGTTCA CCTT   | Spp1 REV    | TTGTTGCTCTGATCAGAGGG           |
| Icam1 FWD  | CGAGGGTTTCTCTACTGGTC     | Tek FWD     | AGGAA GAAA A GCGAGGGGAAA       |
| Icam1 REV  | TGCCAGTCCACATA GTGTTT    | Tek REV     | CCCTCTCTCTGCTACTTTGG           |
| Ifng FWD   | GCTTTAA CAGCAGGCCA GAC   | Tgfb1 FWD   | GCA GTGGCTGAA CCAAGGA          |
| Ifng REV   | GGAA GCA CCAAGGTGCAAGT   | Tgfb1 REV   | GCA GTGAGCGCTGAATCGA           |
| Igfbp7 FWD | AA TCCA TGAGCCTCTGTAGC   | Timp2 FWD   | AGAAACGGTTAAGGACTCCC           |
| Igfbp7 REV | AA GAGA AGTGTGTCAGGCAA   | Timp2 REV   | TGTCTCCCA GTCTGTCTTA           |
| Ii10 FWD   | CCAGGGAGA TCCTTTGATGA    | Timp3 FWD   | CAATCAGTCAA AAGGCAGCAA         |
| Ii10 REV   | AACTGGCCACAGTTTTCAGG     | Timp3 REV   | TCCCTCTGACA TGACA CATA         |
| Ii18 FWD   | GTGTTCCA GGACACA CAAG    | Tlr2 FWD    | TGCTTTCTGCTGGAGATTT            |
| Ii18 REV   | CTTCTTTTGGCAA GCAA GA    | Tlr2 REV    | TGTAA CGCAA CA GCTTCA GG       |
| Ii6 FWD    | GTGGCTAA GGACCAAGACCA    | Tlr4 FWD    | GCA TGCTTACA CCA CCTCT         |
| Ii6 REV    | ACCA CAGTAGGAA TGTCCA    | Tlr4 REV    | GTCTCCA CAGCCA CCA GATT        |
| Junb FWD   | GCCTTTCTA TCA CGA CTA CT | Tnf FWD     | CGCTACA TCA CTGAA CCTCT        |
| Junb REV   | AAGGTGGGTTTCA GGAGTTT    | Tnf REV     | TTCTCTCAA TGA CCGGTA GG        |
| Kdm6a FWD  | AGTTCTGCA CCA CTGCTA TT  | Vcam1 FWD   | TGCAAGGAGCTA ACCAGAAA          |
| Kdm6a REV  | TTGACACTCCACACTTGGAA     | Vcam1 REV   | ATCATGGGACCA TTCCA GTC         |
| Kdm6b FWD  | ACTTCTTGGA CCA GTA CCCC  | Vegfa FWD   | GAGAGAGGCCGAA GTCTTTT          |
| Kdm6b REV  | TTCA GTTCCCA CTCTCTCCC   | Vegfa REV   | TTGGAA CCGGCA TCTTTA TC        |
| Kdr FWD    | CGCTCACCTCTGTTTAAATG     | Vim FWD     | CGCCA TCAA CACTGAGTTCAA        |

TableS2. Primers CHIP-qPCR

| <b>Primer</b> | <b>Sequence</b>          |  |
|---------------|--------------------------|--|
| Icam1 FWD     | CTACCTGCACTTTGCCCT       |  |
| Icam1 REV     | GGATCACAACGGTGACCA       |  |
| Kim1 FWD      | TGGAGATTCCTGGATGGTTT     |  |
| Kim1 REV      | TAGAAGCTTACCTGGTTTAACTTG |  |
| Ngal FWD      | ACTCAGAACTTGATCCCTGC     |  |
| Ngal REV      | CCTTCAGGGTCCTACCTGAT     |  |
| Tnf FWD       | AGTGCCTCTTCTGCCAGTTC     |  |
| Tnf REV       | GCAGGTTCTGTCCCTTTCAC     |  |

**Table S3. Antibodies used in Matix ChIP**

| Figure | Antibody               | Catalog No | Source            | Manufacturer   |
|--------|------------------------|------------|-------------------|----------------|
| 3      | Pol II CTD (4H8)       | sc-47701   | Mouse monoclonal  | Santa Cruz     |
| S2     | Pol II CTD pSer2/pSer5 | PA5-17563  | Rabbit polyclonal | ThermoPierce   |
| S3     | Pol II CTD (8WG18)     | MMS-126R   | Mouse monoclonal  | Covance        |
| S12    | H3K9m2                 | ab1220     | Mouse monoclonal  | ABCAM          |
| S11    | H3K27m3 (G.299.10)     | MA511198   | Mouse monoclonal  | ThermoPierce   |
| S15    | H2BK120ub1             | 39624      | Mouse monoclonal  | Active Motif   |
| S14    | H2AK119ub1 (D27C4)     | 8240       | Rabbit monoclonal | Cell Signaling |
| S5     | H3K27Ac                | SAB5100010 | Rabbit polyclonal | Sigma          |
| S13    | macroH2A               | 07-219     | Rabbit polyclonal | UPSTATE        |
| S4     | H3K18Ac                | PA5-17801  | Rabbit polyclonal | ThermoPierce   |
| 4      | H3K9Ac                 | 701269     | Mouse monoclonal  | ThermoPierce   |
| S7     | H3K4m2                 | 07-030     | Rabbit polyclonal | Millipore      |
| 5      | H3K4m3                 | PA5-17420  | Rabbit polyclonal | ThermoPierce   |
| S10    | H3K79m2                | OAAH00059  | Rabbit polyclonal | Aviva          |
| S9     | H3K36m2                | OAAH00061  | Rabbit polyclonal | Aviva          |
| 6      | H3K36m3                | OAAH00062  | Rabbit polyclonal | Aviva          |
| S6     | H4K5/8/12/16Ac         | 06-866     | Rabbit serum      | UPSTATE        |
| S8     | H3pSer10               | 701258     | Rabbit monoclonal | ThermoPierce   |
| 7      | H4pSer1                | PA5-27064  | Rabbit polyclonal | ThermoPierce   |

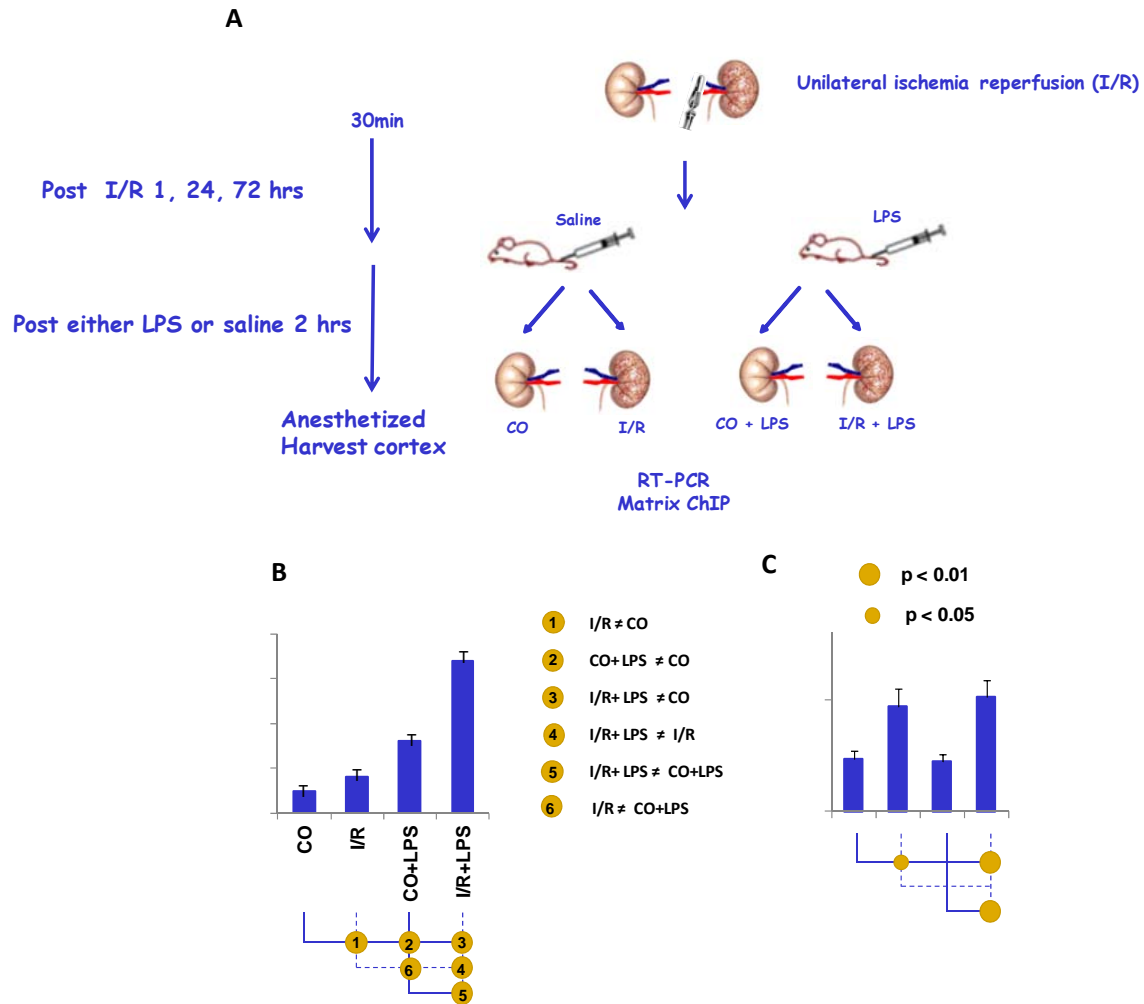

**Fig.S1. Ischemia-reperfusion and endotoxin acute renal injury model and data analysis.** **A. Model.** Mice were anesthetized and subjected to a midline abdominal incision under sterile conditions and, after 30 min of unilateral renal artery occlusion, the clamp was released (ischemia/reperfusion, or I/R). Either 1, 24 or 72 hours later, I/R injury mice received a tail vein injection of either lipopolysaccharide (LPS) or saline [1]. Two hours after these injections, mice were anesthetized and kidneys were harvested and rapidly frozen for RT-PCR and Matrix ChIP analysis [2,3]. Thus, the timing of harvesting the kidneys relative to I/R injury was 3, 26 and 76 hrs, and 2 hrs post either LPS or saline treatment (Methods). **B. GraphGrid analysis.** Solid circles positioned at line intersections designate comparison between a given pair of means (one bar graph vs. another bar graph). The bar graph above the circle represents one of the paired means. The second of the paired means is found by tracing left along

horizontal line from the circle all the way to farthest left angle corner where the vertical line points to the bar graph for the paired comparison. The graph illustrates bar (means + SEM). Five different paired statistical comparisons are done as shown with the numbered circles. **C. Statistical analysis** is done using Bonferroni correction. Statistical differences between two means (p value) are shown by the size of the solid circle. :  $p < 0.05$  by small circle,  $p < 0.01$  by large circle, and no circle indicating the differences are not statistically significant.

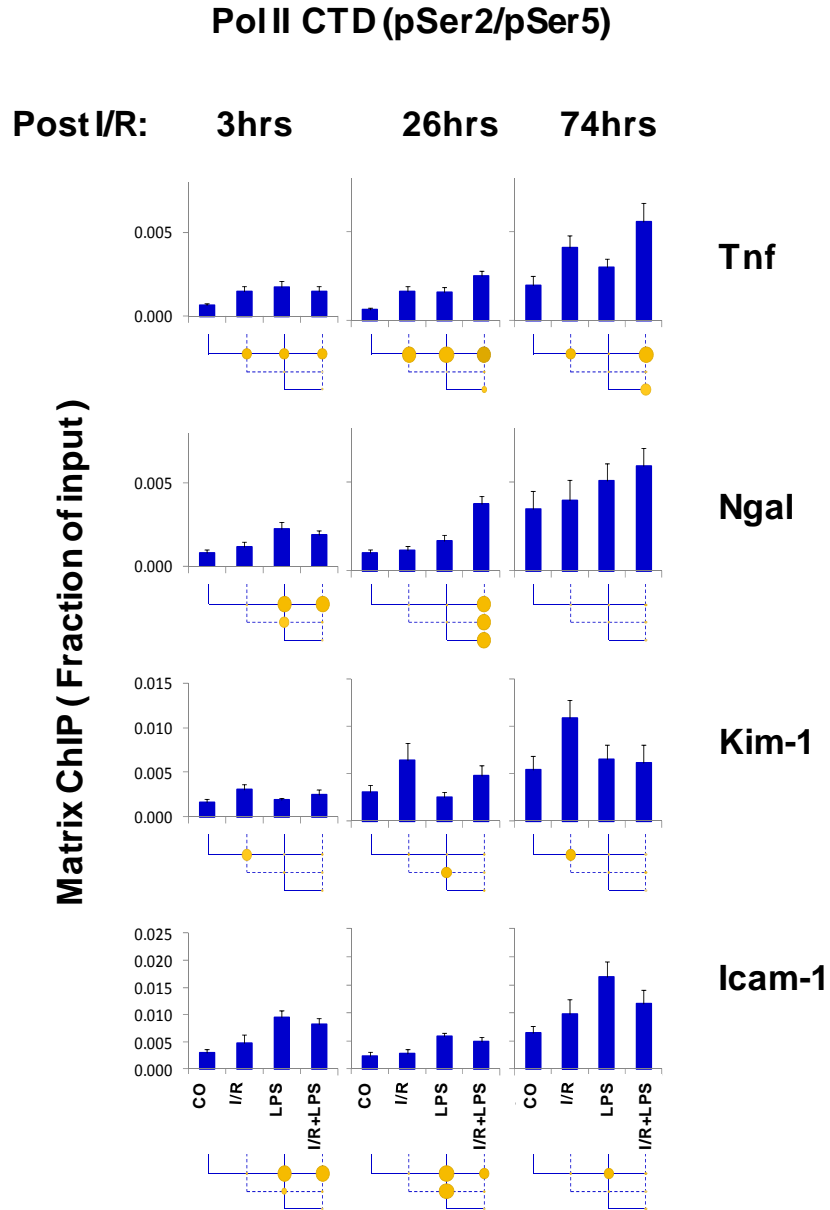

**Fig.S2. Analysis of phosphorylated serine 2 and 5 RNA polymerase II CTD (Pol II CTD pSer2/pSer5) at Tnf, Ngal, Kim-1 and Icam-1 genes following unilateral kidney I/R and LPS injection.** Sheared cross-linked renal cortex chromatin from mice were assayed using a polyclonal antibody that detects phosphorylated CTD on serine 2 and 5. ChIP DNA were analyzed at Tnf, Ngal, Kim-1 and Icam-1 genes in real-time PCR. Data represent mean  $\pm$  SEM (6 animals from each group), expressed as fraction of input.

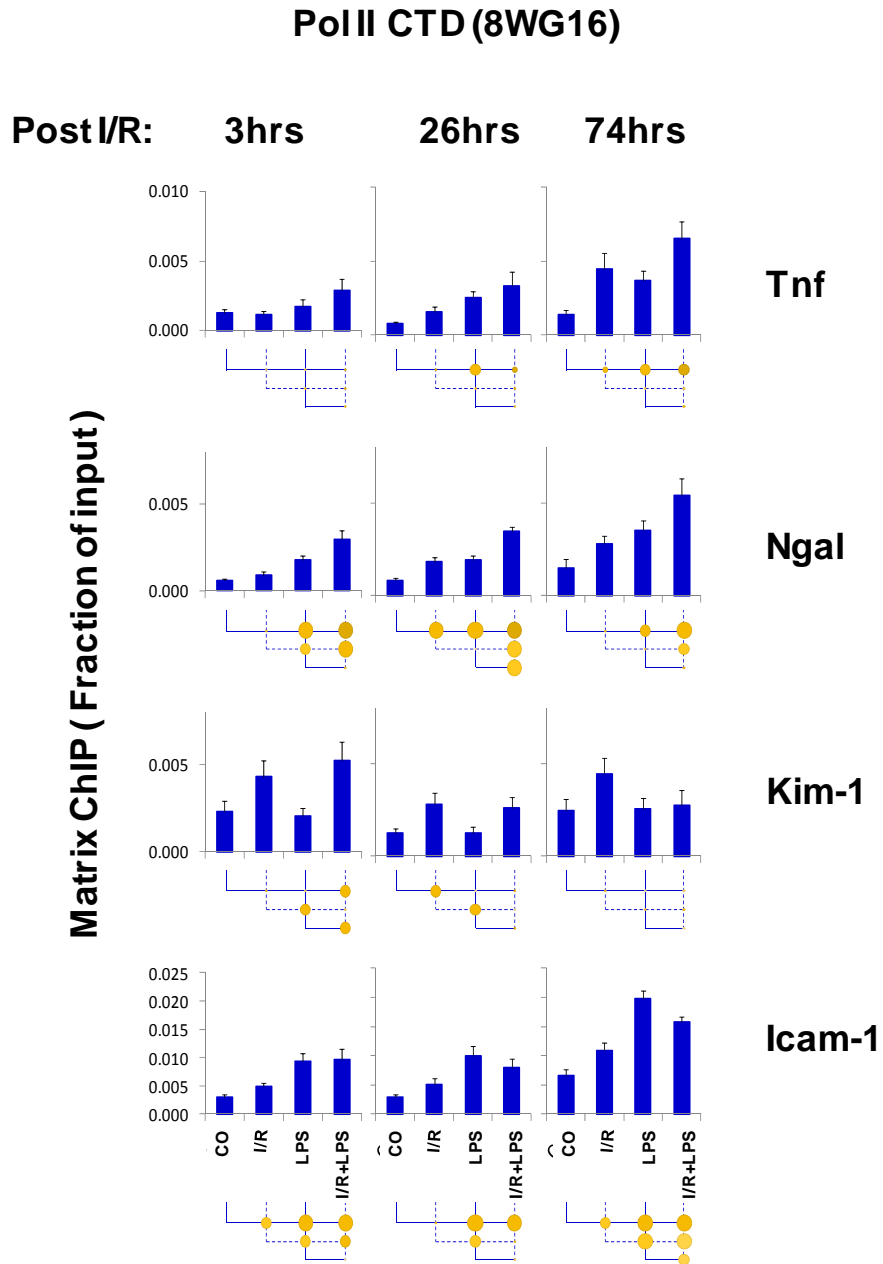

**Fig.S3. Analysis of unphosphorylated RNA polymerase II CTD (Pol II CTD) at Tnf, Ngal, Kim-1 and Icam-1 genes following unilateral kidney I/R and LPS injection.** Sheared cross-linked renal cortex chromatin from mice were assayed using a monoclonal antibody that detects unphosphorylated CTD (8WG16). ChIP DNA were analyzed at Tnf, Ngal, Kim-1 and Icam-1 genes in real-time PCR. Data represent mean  $\pm$  SEM (6 animals from each group), expressed as fraction of input.



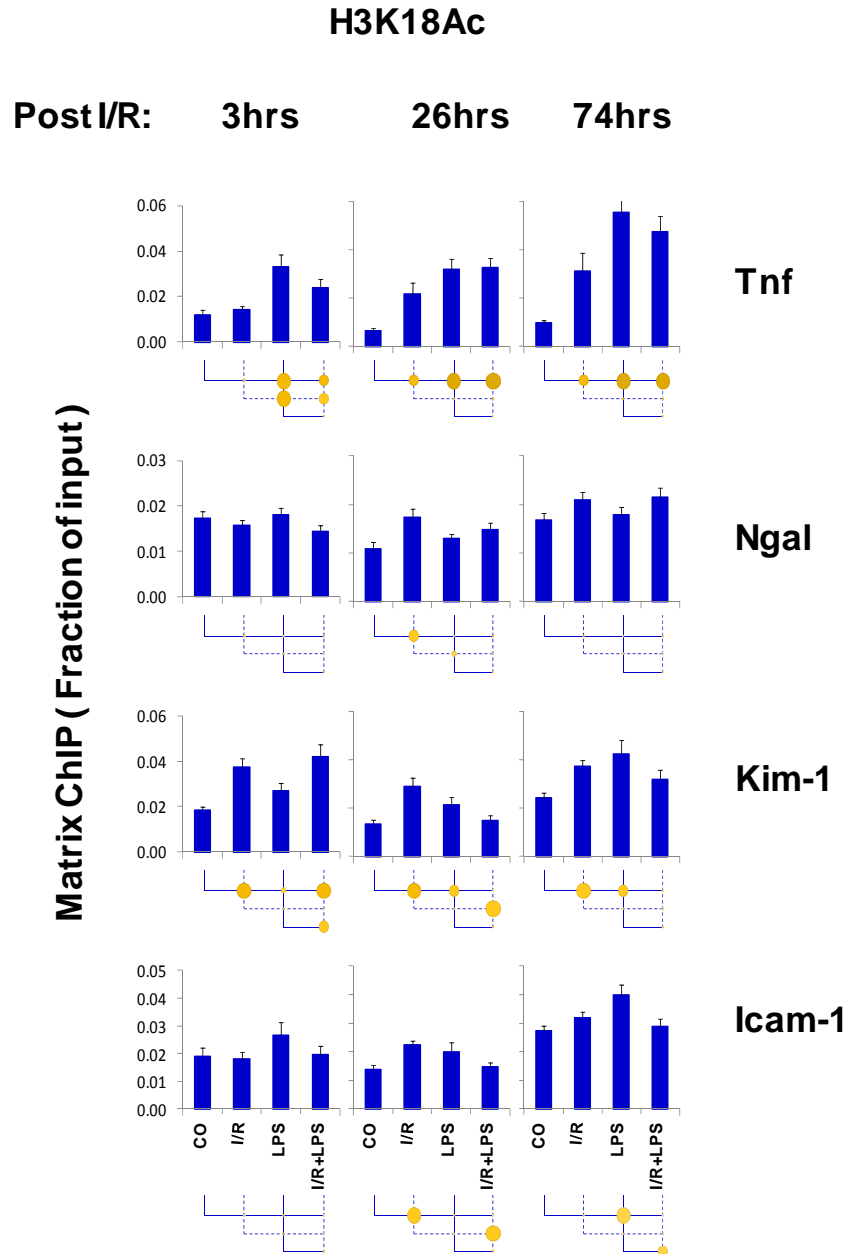

**Fig.S4. Permissive histone H3 lysine 18 acetylation (H3K18Ac) at Tnf, Ngal, Kim-1 and Icam-1 genes following unilateral kidney I/R and LPS injection.** Sheared cross-linked renal cortex chromatin from mice were assayed using polyclonal antibody to H3K18Ac antibody. Data represent mean  $\pm$  SEM (6 animals from each group), expressed as fraction of input.

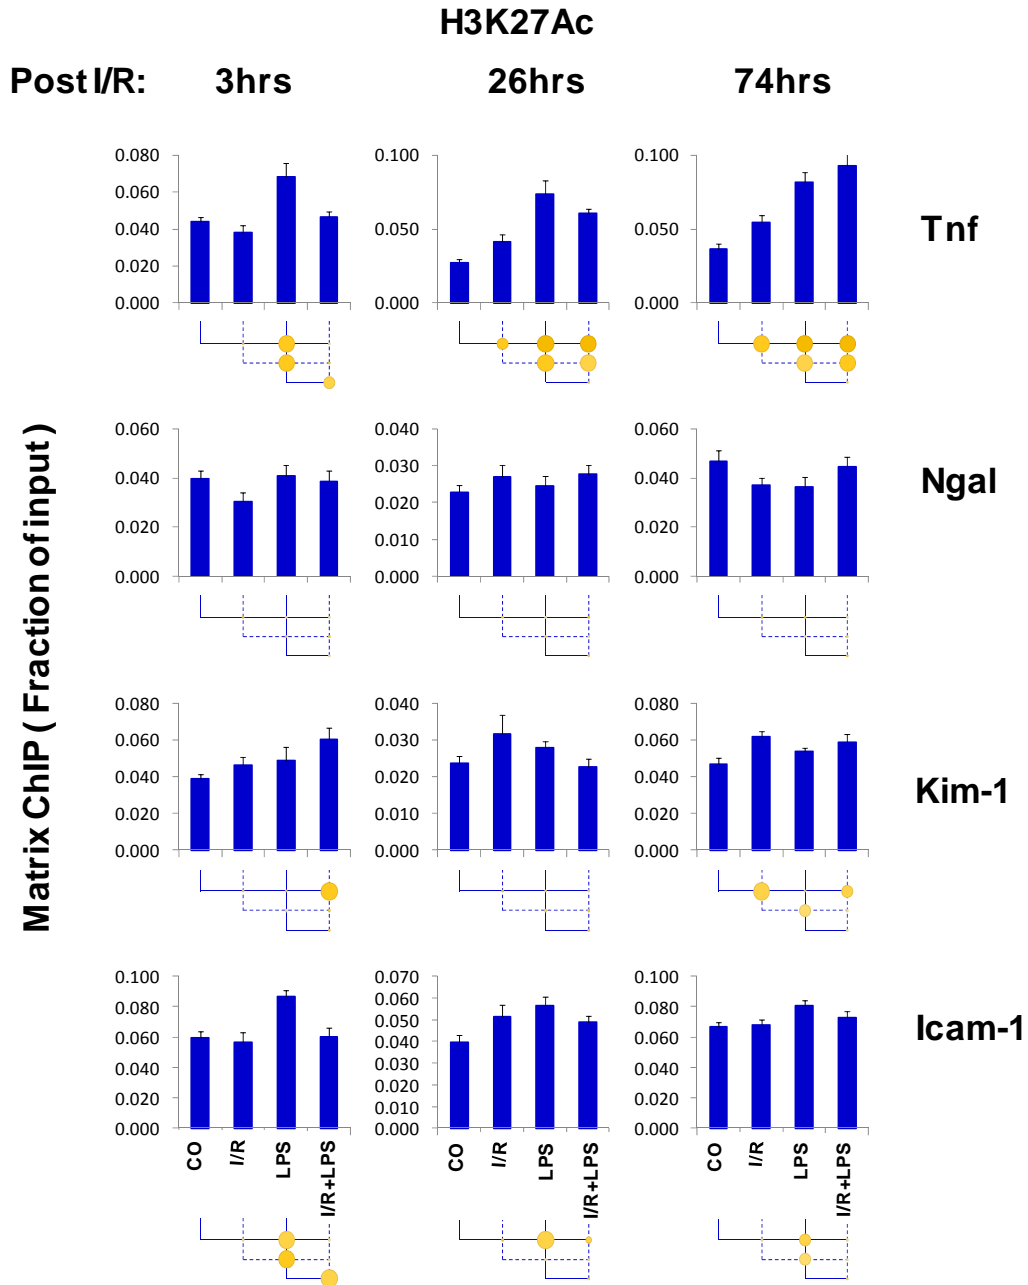

**Fig.S5. Permissive histone H3 lysine 27 acetylation (H3K27Ac) at Tnf, Ngal, Kim-1 and Icam-1 genes following unilateral kidney I/R and LPS injection.** Sheared cross-linked renal cortex chromatin from mice were assayed using monoclonal antibody to H3K27Ac antibody. Data represent mean  $\pm$  SEM (6 animals from each group), expressed as fraction of input.

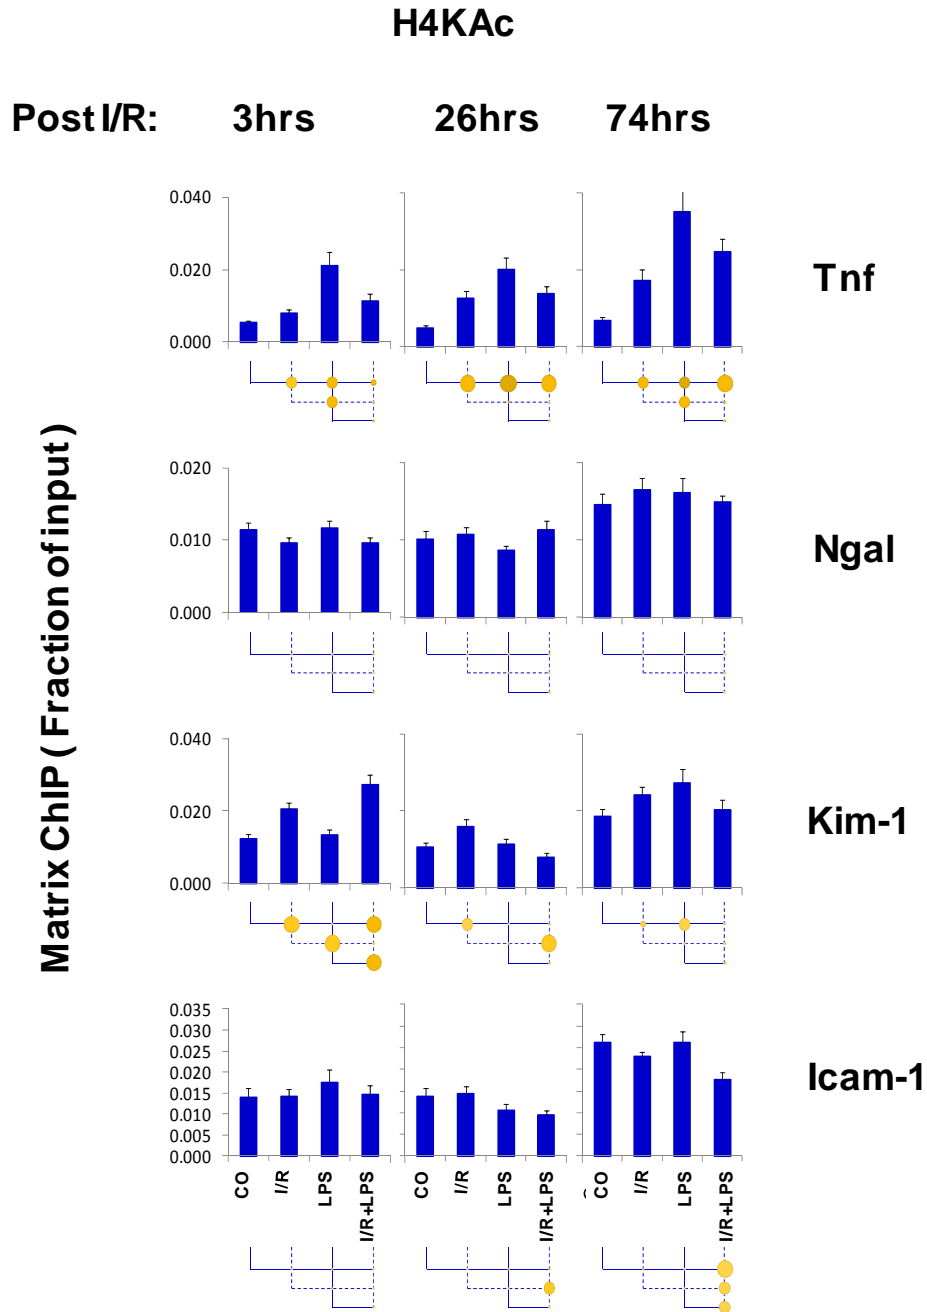

**Fig.S6. Permissive histone H4 lysine 5,8,12,16Ac acetylation (H4KAc) at Tnf, Ngal, Kim-1 and Icam-1 genes following unilateral kidney I/R and LPS injection.** Sheared cross-linked renal cortex chromatin from mice were assayed using rabbit antiserum to H4K5/8/12,16Ac. Data represent mean  $\pm$  SEM (6 animals from each group), expressed as fraction of input.

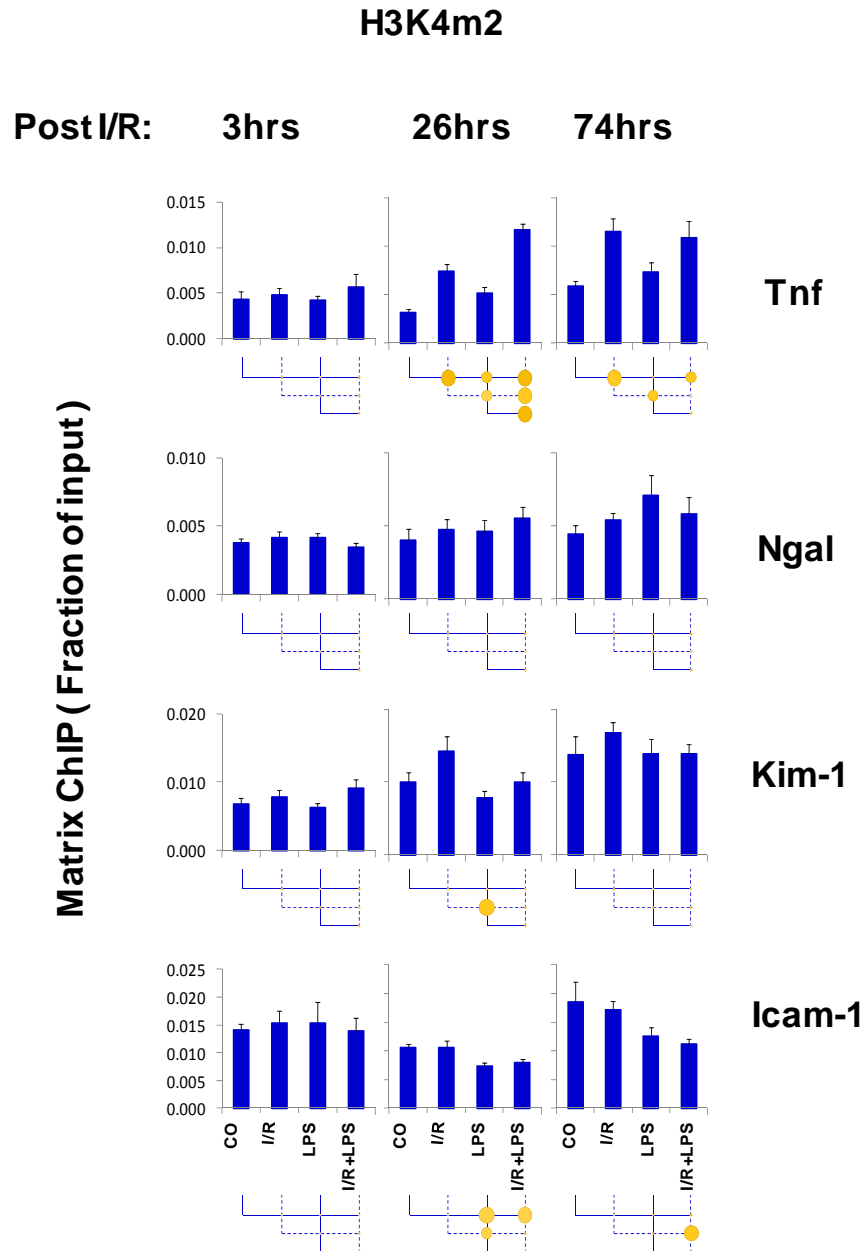

**Fig.S7. Permissive histone H3 lysine 4 di-methylation (H3K4m2) at Tnf, Kim-1, Ngal, and Icam-1 genes following unilateral kidney I/R and LPS injection.** Sheared cross-linked renal cortex chromatin from mice were assayed using polyclonal antibody to H3K4m2. Data represent mean  $\pm$  SEM (6 animals from each group), expressed as fraction of input.

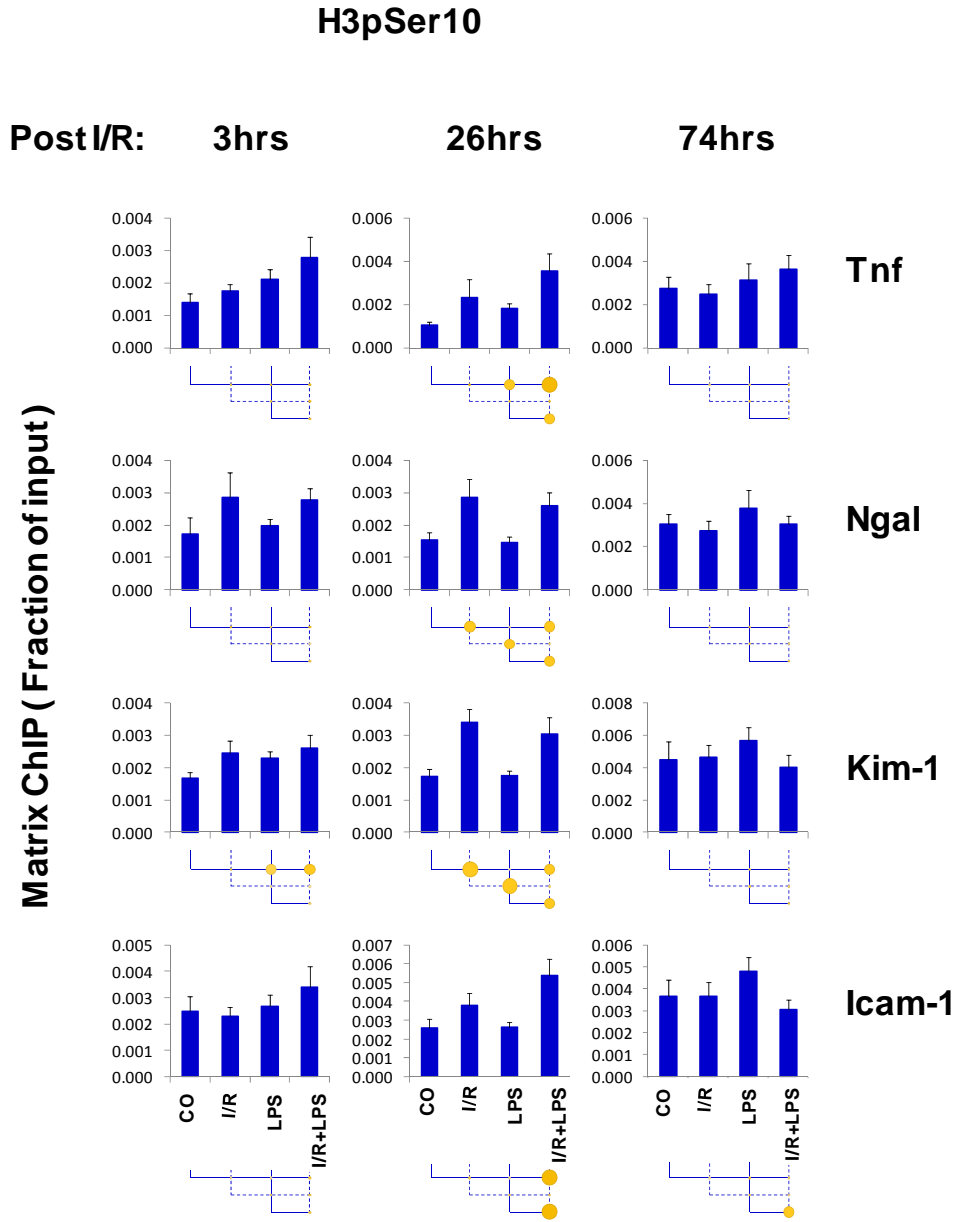

**Fig.S8. Transcription permissive histone H3 serine10 phosphorylation (H3pSer10) at Tnf, Kim-1, Ngal, and Icam-1 genes following unilateral kidney I/R and LPS injection.** Sheared cross-linked renal cortex chromatin from mice were assayed using antibody to H3pSer10. Data represent mean  $\pm$  SEM (6 animals from each group), expressed as fraction of input.

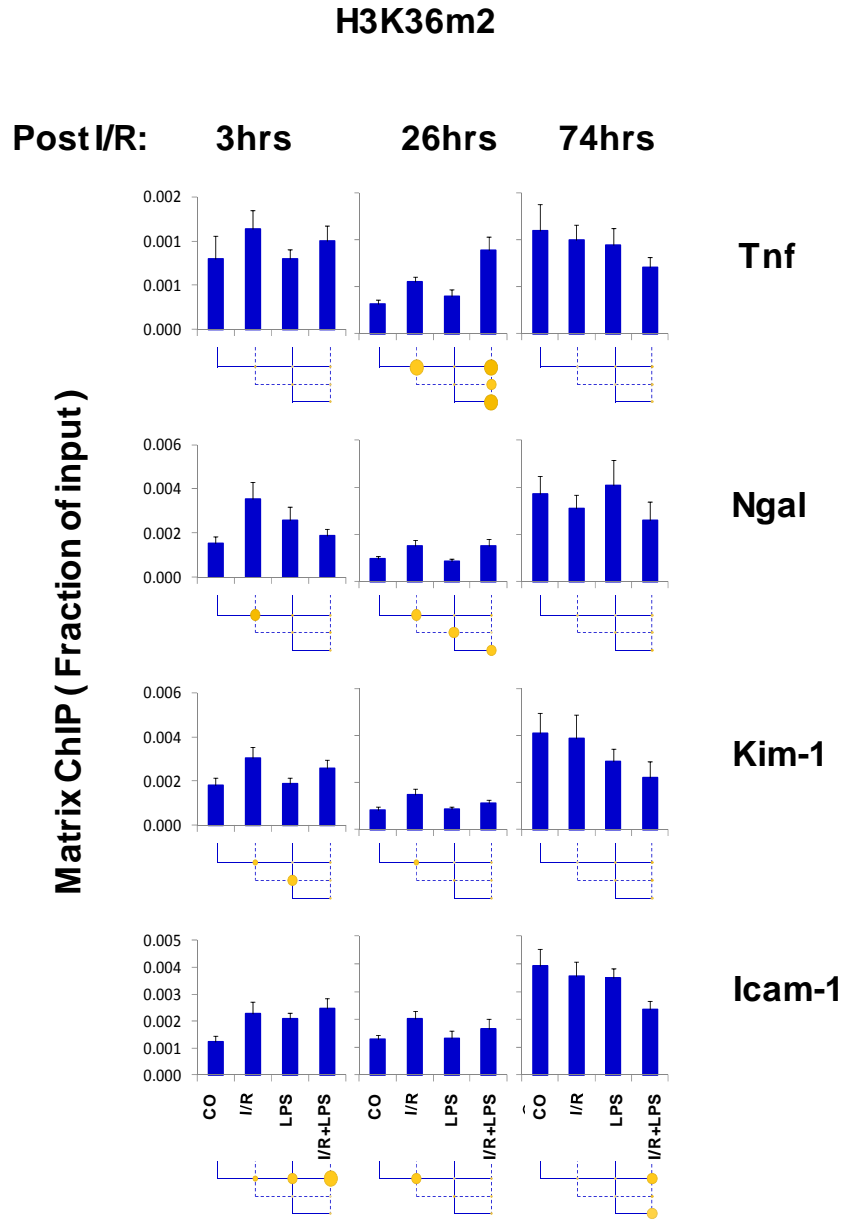

**Fig.S9. Transcription elongation histone H3 lysine 36 di-methylation (H4K36m2) at Tnf, Kim-1, Ngal, and Icam-1 genes following unilateral kidney I/R and LPS injection.** Sheared cross-linked renal cortex chromatin from mice were assayed using polyclonal antibody to H3K36m2. Data represent mean  $\pm$  SEM (6 animals from each group), expressed as fraction of input.

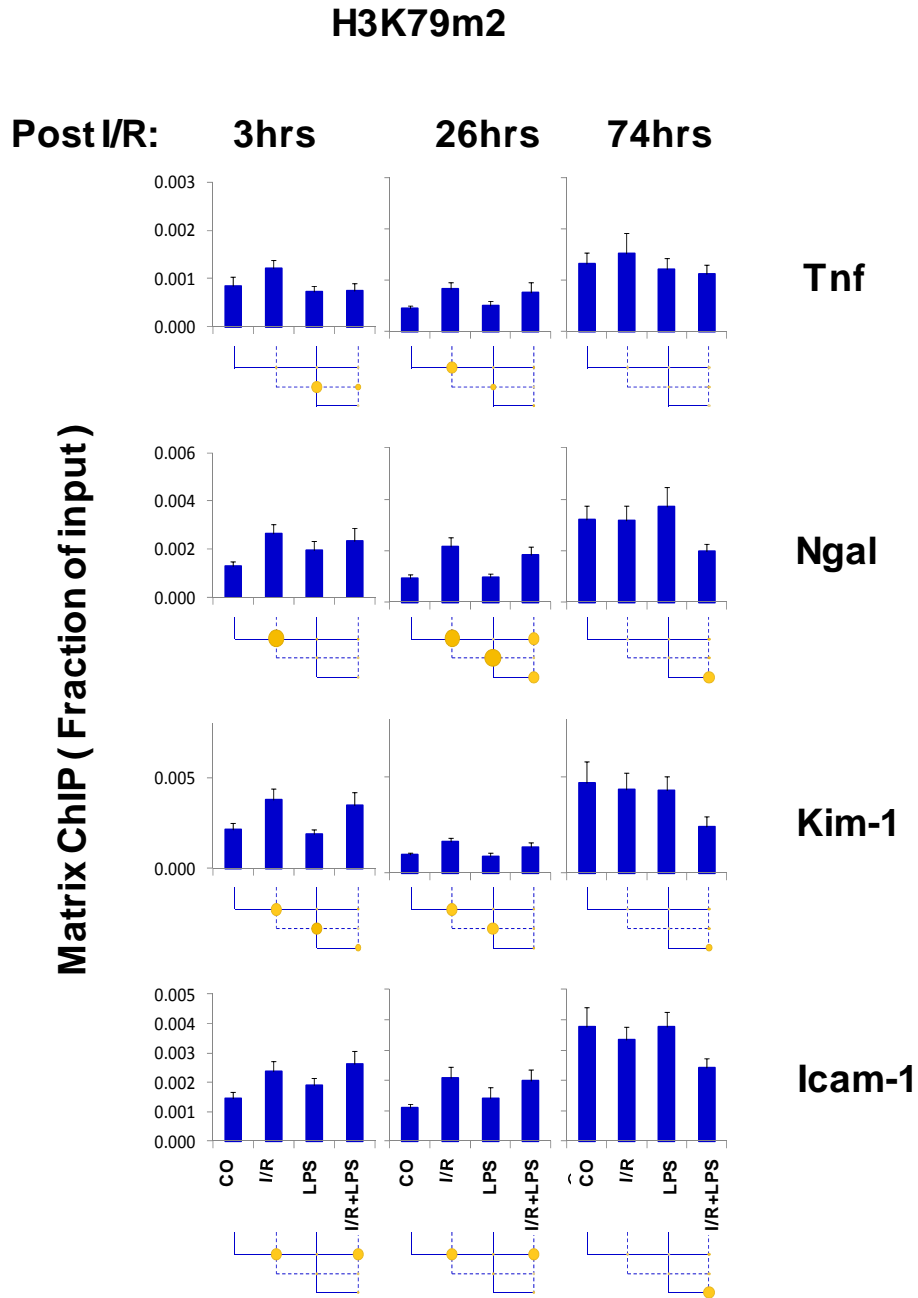

**Fig.S10. Transcription elongation histone H3 lysine 79 di-methylation (H4K79m2) at Tnf, Kim-1, Ngal, and Icam-1 genes following unilateral kidney I/R and LPS injection.** Sheared cross-linked renal cortex chromatin from mice were assayed using polyclonal antibody to H3K79m2. Data represent mean  $\pm$  SEM (6 animals from each group), expressed as fraction of input.

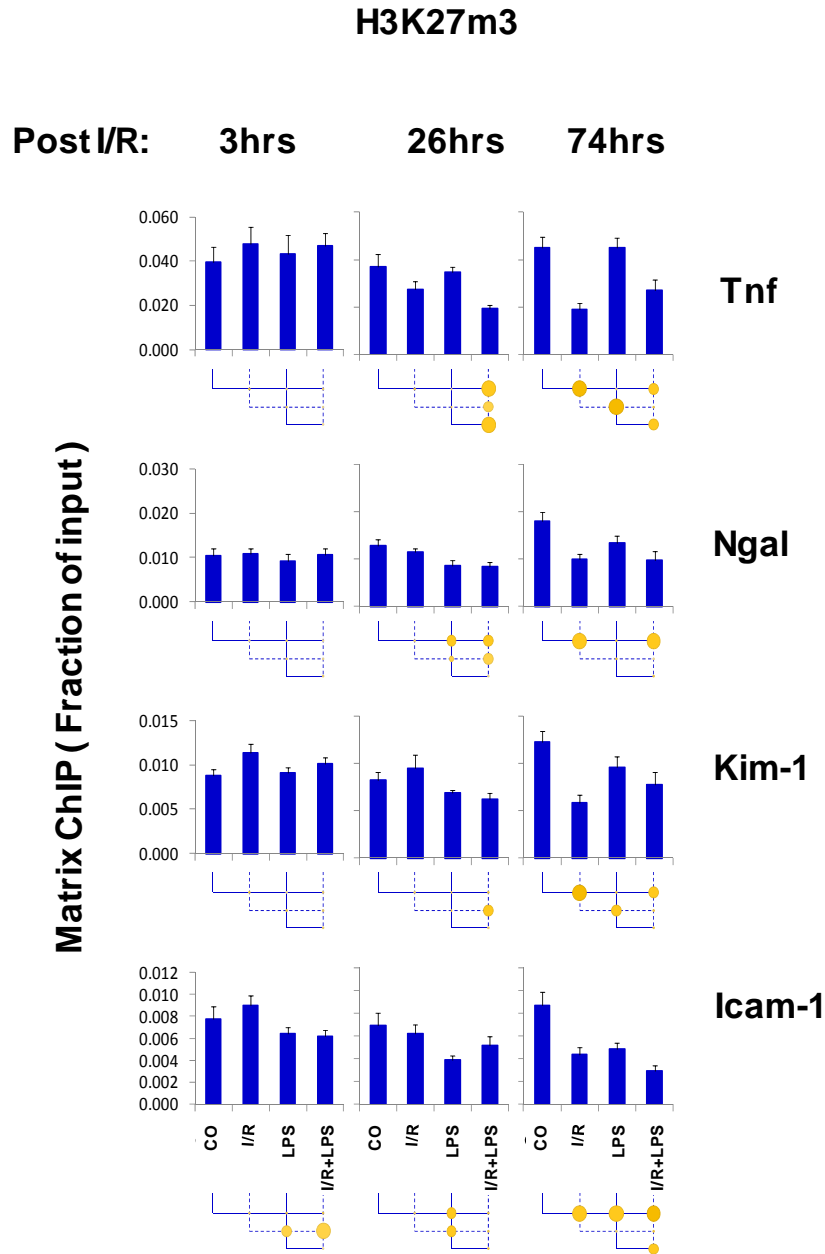

**Fig.S11. Transcription repressive histone H3 lysine 27 tri-methylation (H3K27m3) at Tnf, Ngal, Kim-1, and Icam-1 genes following unilateral kidney I/R and LPS injection.** Sheared cross-linked renal cortex chromatin from mice were assayed using monoclonal antibody to H3K27m3. Data represent mean  $\pm$  SEM (6 animals from each group), expressed as fraction of input.



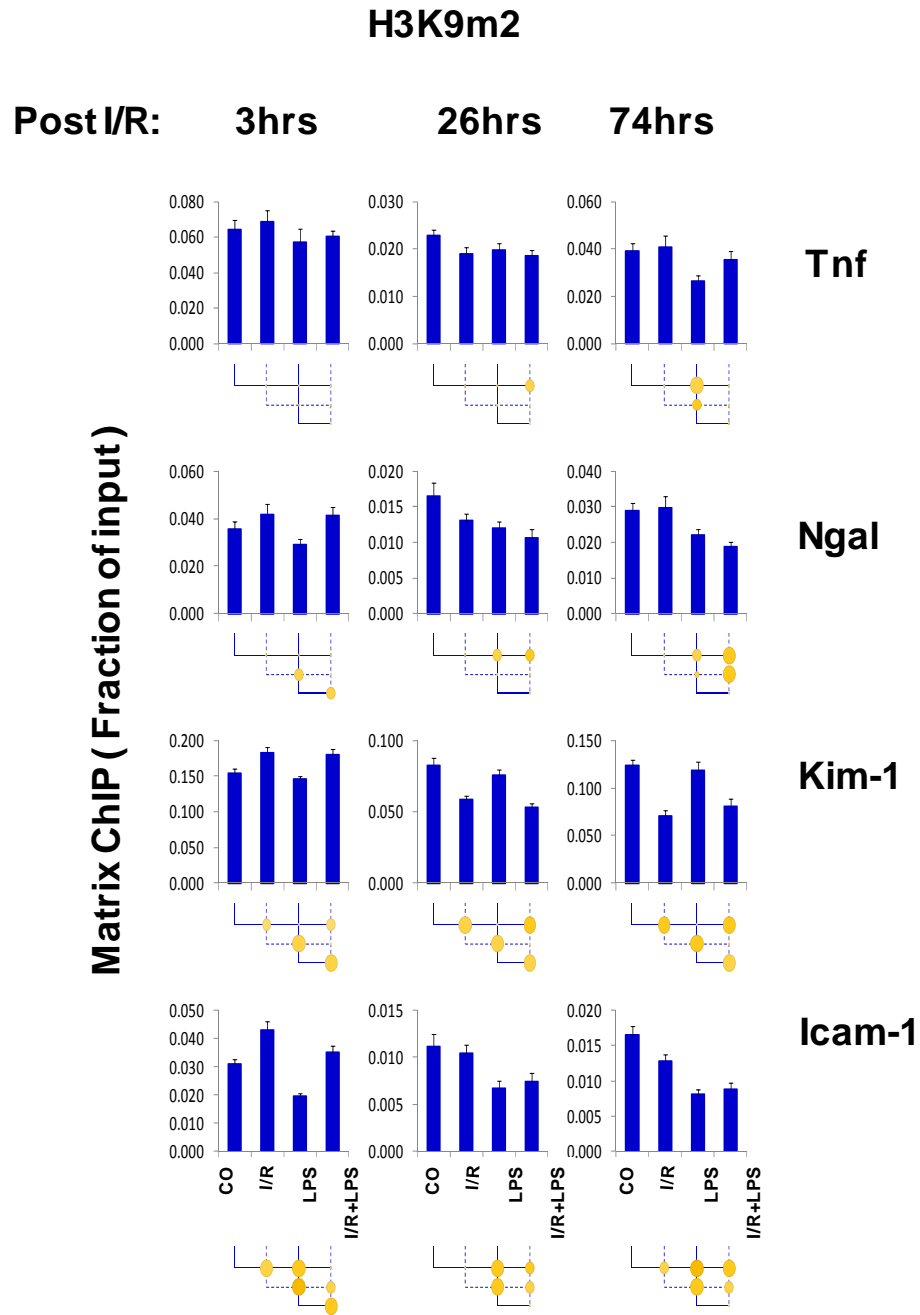

**Fig.S12. Transcription repressive histone H3 lysine 9 di-methylation (H3K9m2) at Tnf, Ngal, Kim-1, and Icam-1 genes following unilateral kidney I/R and LPS injection.** Sheared cross-linked renal cortex chromatin from mice were assayed using monoclonal antibody to H3K9m2. Data represent mean  $\pm$  SEM (6 animals from each group), expressed as fraction of input.

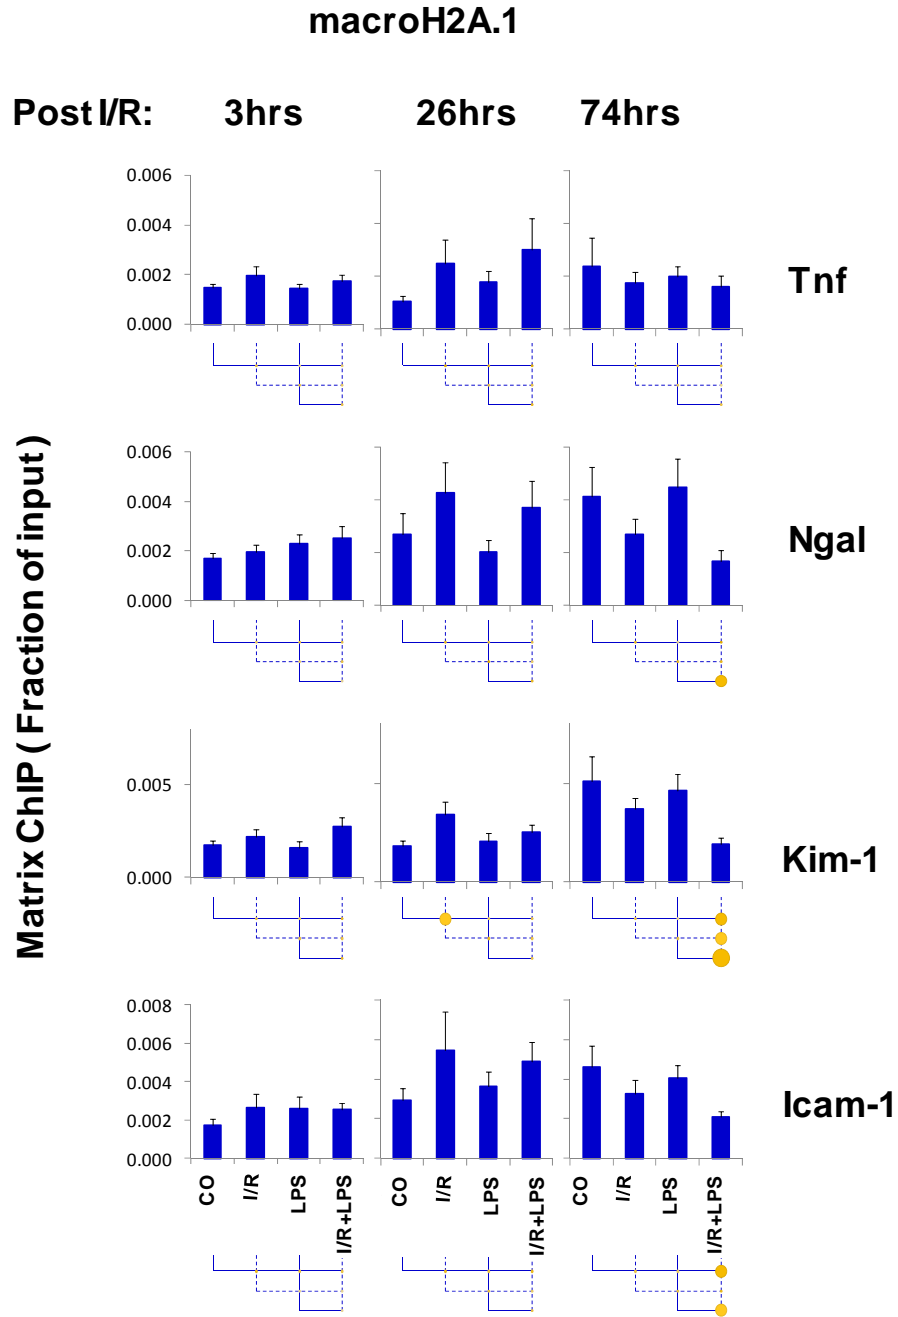

**Fig.S13. Transcription repressive variant histone macro-H2A.1 (macroH2A.1) at Tnf, Ngal, Kim-1, and Icam-1 genes following unilateral kidney I/R and LPS injection.** Sheared cross-linked renal cortex chromatin from mice were assayed using polyclonal antibody to macroH2A.1. Data represent mean  $\pm$  SEM (6 animals from each group), expressed as fraction of input.

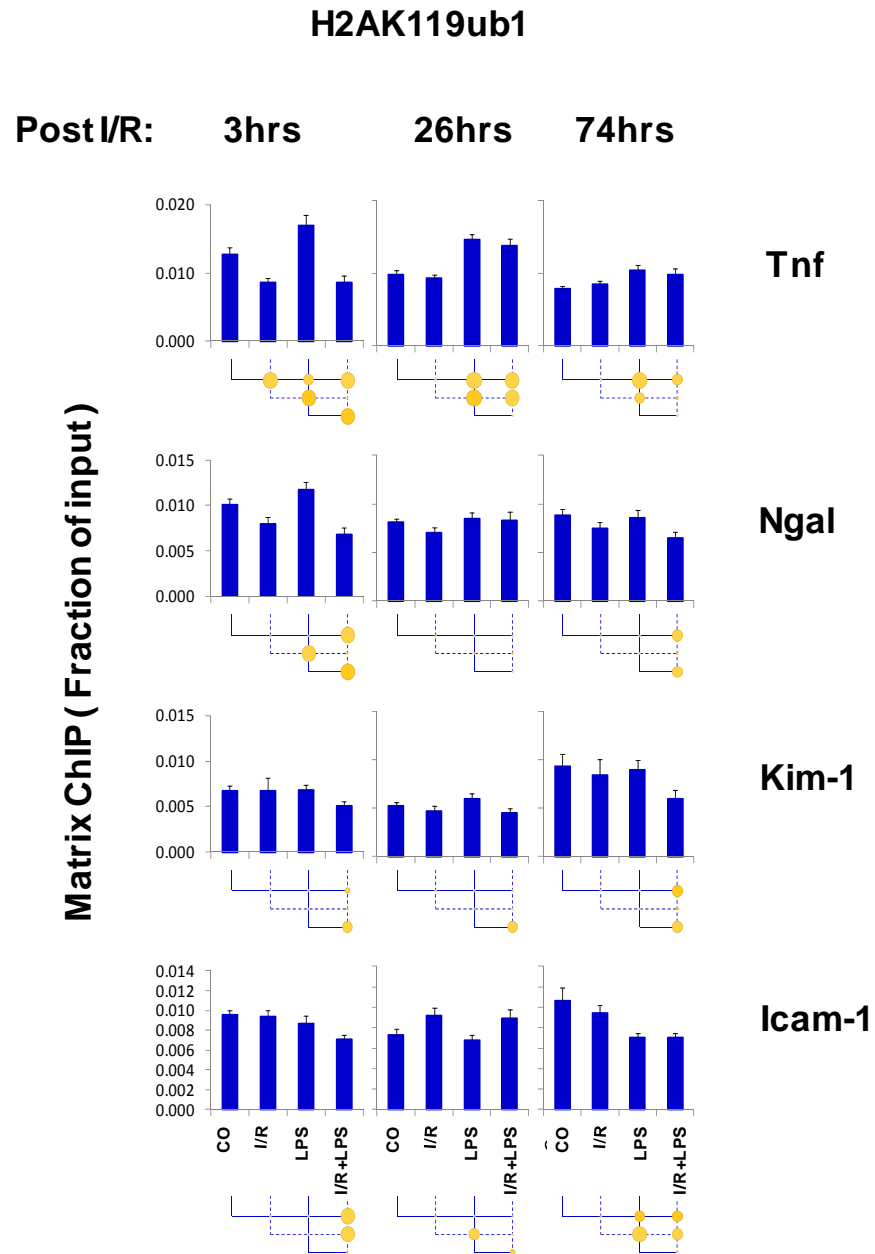

**Fig.S14. Transcription repressive histone H2A lysine 119 mono- ubiquitination (H2AK119ub1) at Tnf, Ngal, Kim-1, and Icam-1 genes following unilateral kidney I/R and LPS injection.** Shared cross-linked renal cortex chromatin from mice were assayed using rabbit monoclonal antibody to H2AK119ub1. Data represent mean  $\pm$  SEM (6 animals from each group), expressed as fraction of input.

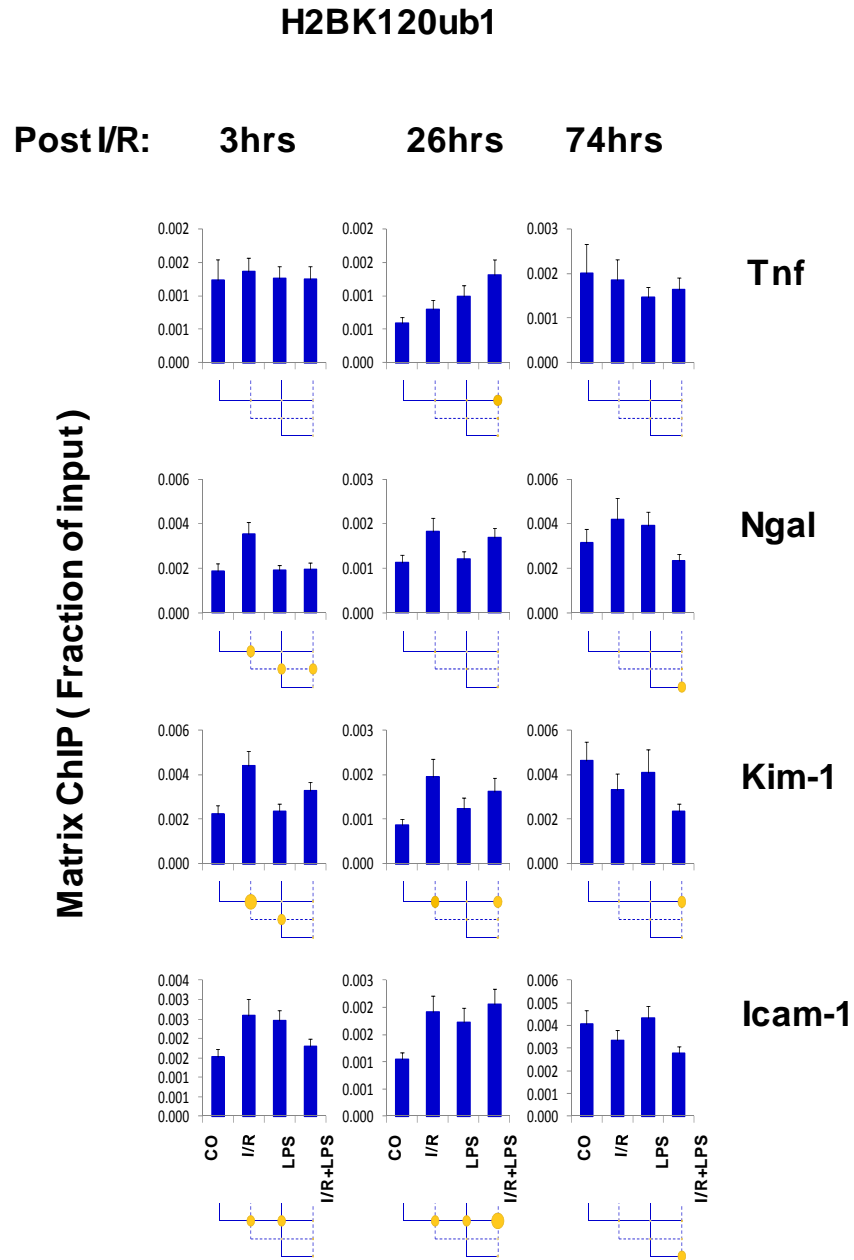

**Fig.S15. Transcription repressive histone H2B lysine 120 mono- ubiquitination (H2BK120ub1) at Tnf, Ngal, Kim-1, and Icam-1 genes following unilateral kidney I/R and LPS injection.** Sheared cross-linked renal cortex chromatin from mice were assayed using mouse monoclonal antibody to H2BK120ub1. Data represent mean  $\pm$  SEM (6 animals from each group), expressed as fraction of input.

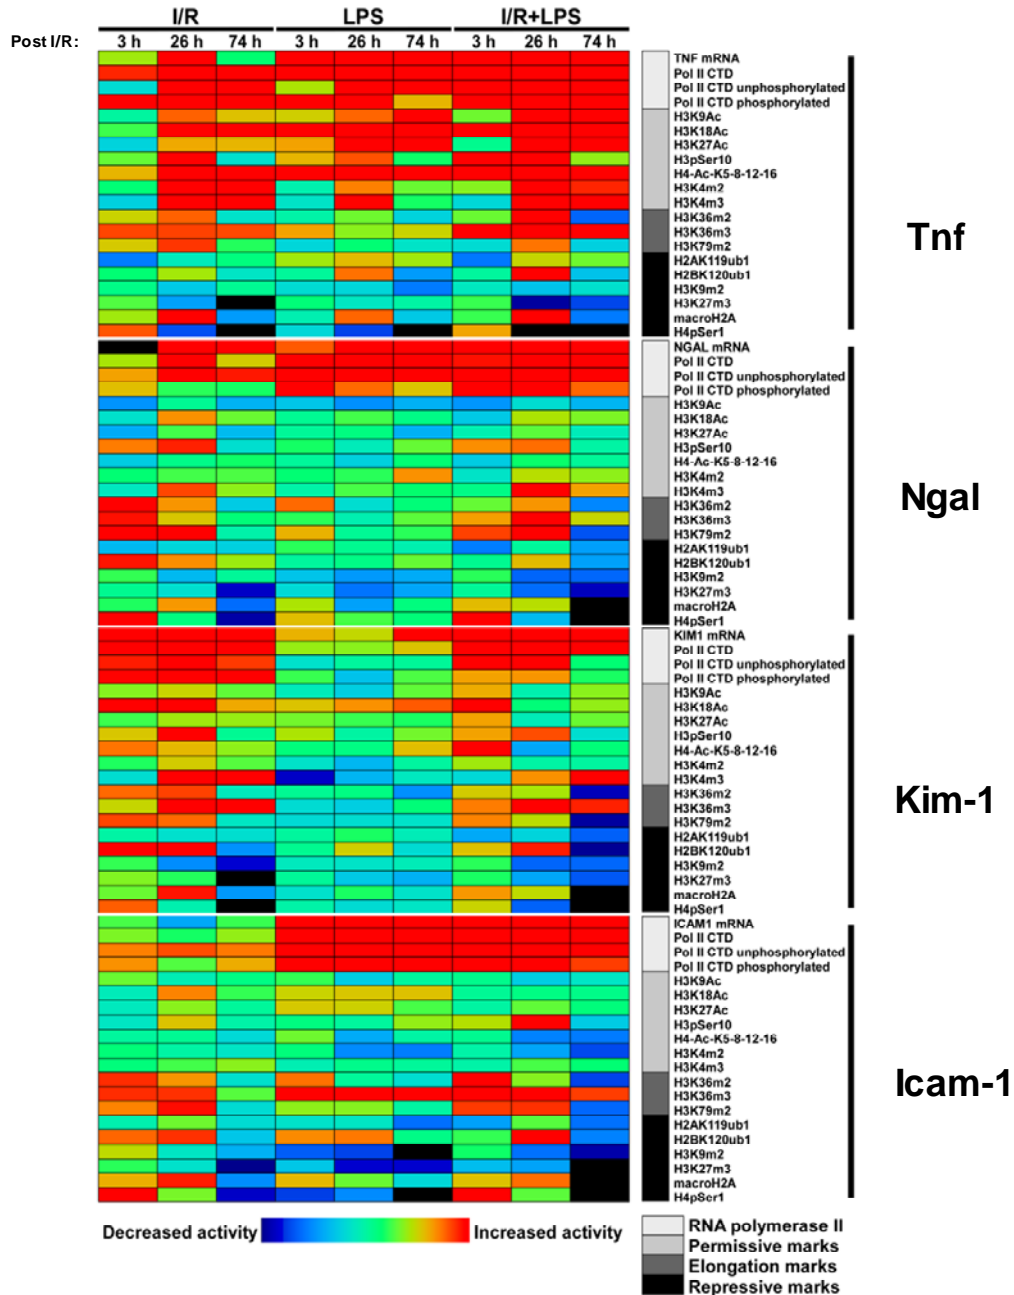

**Fig.S16 Integrated transcriptional and epigenetic analysis of Tnf, Kim-1, Ngal, and Icam-1 portraits following unilateral kidney injury.** Log-transformed values for mRNA and Pol II levels, as well as several epigenetic modifications during temporal progression of AKI due to I/R, LPS and I/R+LPS are depicted as a heatmap. While there is a general increase in permissive marks and reduction of repressive marks in a time-dependent manner, note the heterogeneous response pattern of individual AKI-induced genes.
